# Supplementary material for: Two functional loci in the promoter of EPAS1 gene involved in high-altitude adaptation of Tibetans
Source: PubMed Central journal article supplement — Sci Rep. 2014 Dec 12;4:7465. doi: 10.1038/srep07465 (PMC4264014; doi:10.1038/srep07465), 2014-12-12

## Supplementary information

### **Two functional loci in the promoter of *EPASI* gene involved in high-altitude adaptation of Tibetans**

Xiang-Hong Xu<sup>1 †</sup>, Xue-Wen Huang<sup>2,3 †</sup>, Li Qun<sup>4</sup>, Ya-Nan Li<sup>1</sup>, Yi Wang<sup>1</sup>, Chao Liu<sup>5</sup>, Yanyun Ma<sup>1</sup>, Qing-Mei Liu<sup>1</sup>, Kang Sun<sup>5</sup>, Feng Qian<sup>1</sup>, Li Jin<sup>1\*</sup>, Jiucun Wang<sup>1\*</sup>

<sup>1</sup> State Key Laboratory of Genetic Engineering and Ministry of Education Key Laboratory of Contemporary Anthropology, Collaborative Innovation Center for Genetics and Development, School of Life Sciences and Institutes of Biomedical Sciences, Fudan University, 220 Handan Road, Shanghai 200433, P.R. China.

<sup>2</sup> Clinical laboratory of Huadong Sanatorium, Dajishan, Meiyuan Garden, Wuxi, Jiangsu 214065, P.R. China.

<sup>3</sup> Public Health Bureau for Shigatse District, 5 Keji Road, Shigatse District, Tibet 857000, P.R. China.

<sup>4</sup> Department of Gynecology and Obstetrics, The People's Hospital of Shigatse District, 28 Shanghai Middle Road, Shigatse District, Tibet 857000, P.R. China.

<sup>5</sup> Department of Physiology and Biophysics, School of Life Sciences, Fudan University, 220 Handan Road, Shanghai 200433, P.R. China.

<sup>†</sup> These two authors contributed equally to this work.

\* Correspondence to: Li Jin or Jiucun Wang, Ministry of Education Key Laboratory of Contemporary Anthropology, School of Life Sciences, Fudan University, 220 Handan Road, Shanghai 200433, P.R. China.

E-mail: lijin.fudan@gmail.com; jcwang@fudan.edu.cn

## **Supplementary methods**

### **Stable cell line establishment**

Flp-In-293 cells (Invitrogen) were used to stably express EPAS1 protein by integrating the pcDNA5/FRT/TO vector containing *EPAS1* coding sequence into the cell genomic locus via Flp recombinase-mediated DNA homologous recombination at the Flp recombination target (FRT) site, according to the manufacturer's instructions. Flp-In-293 cells were co-transfected with pcDNA5/FRT-EPAS1 plasmid together with pOG44 (which encodes the Flp-In recombinase) at the ratio of 1:9 (w/w) by lipofectamine 2000 (Invitrogen) according to the manufacturer's protocol. Forty-eight hours after transfection, cells were subject to positive selection with 15 µg/mL of blasticidin and 150 µg/mL hygromycin for two weeks. Selective media was replaced every three days to remove dead cells. Antibiotic-resistant colonies were isolated and re-cloned by serial dilution to establish individual clones, which were further confirmed by analyzing Zeocin-sensitivity and lack of β-galactosidase activity. To confirm the expression of *EPAS1*, cells were treated with 1 µg/mL tetracycline (Invitrogen) for 24 h.

### **Electrophoretic mobility shift assay (EMSA)**

Non-radioactive EMSAs were performed with IKZF1 isoform 3 proteins and biotin-labeled double stranded probes, which were selected on the basis of predicted IKZF1 binding sites in the promoter of the *EPAS1* gene (Figure S1). Non-radioactive EMSAs were also performed with Sp1 proteins and biotin-labeled double stranded probes which were made by the 40-bp insertion fragment. Nuclear extract prepared from HEK293 cells transfected with or without pcDNA 3.1-IKZF1-myc plasmid using NE-PER Nuclear and Cytoplasmic Extraction Reagents (Thermo Scientific) was stored at -80°C and thawed at room temperature just before use. Two kinds of double-stranded biotin-labeled probes were used for IKZF1 EMSAs, which were named G probe and C probe,

respectively, with only one base-pair difference at the site of rs56721780:G>C. The double-stranded biotin-labeled probes were made by annealing the 5'-biotin end-labeled sense and antisense complementary oligonucleotides at a 1:1 molar ratio in the annealing buffer (100 mM Tris-HCl [pH 7.5], 500 mM NaCl, 10 mM EDTA) at 95°C for 5 min and slowly cooled down to room temperature. The annealed biotin-labeled probes were diluted to 10 fmol/μl with Tris-EDTA solution and stored at -20°C before use. EMSAs were performed using a LightShift chemiluminescent electrophoretic mobility shift assay kit (Thermo Scientific) according to the manufacturer's instructions. Briefly, an aliquot of nuclear extract containing 3 μg of protein was incubated with 2 μl of 10 × binding buffer, 2.5% glycerol, 0.05% NP-40, 5 mM MgCl<sub>2</sub>, and 1 μg of poly (dI-dC) in a total volume of 20 μl for 30 min at room temperature. The reaction mixtures were loaded on a 6% or 5% native polyacrylamide gel and transferred to Immobilon-NY<sup>+</sup> membrane (Millipore). The membrane was then crosslinked for 15 min with the membrane face down on a transilluminator equipped with 312 nm bulbs. After the membrane incubated with LightShift stabilized streptavidin-horseradish peroxidase conjugate and the luminol/enhancer stable peroxide solution, the protein and probe complexes were visualized by ImageQuant LAS 4000 mini system. For competition assays to test binding specificity of predicted proteins, excess (100 × or 200 ×) unlabeled G or C competitor or excess (200 × or 400 ×) unlabeled insertion competitor was added to the EMSA reaction. The unlabeled competitors have the same sequence with the corresponding labeled probes and were annealed as previously described for the labeled probes. For supershift EMSAs, 1 μl of anti-myc mouse monoclonal antibody (Cell Signaling Technology, Danvers, MA, USA) or anti-Sp1 polyclonal antibody (Millipore) was pre-incubated with the nuclear protein for 1 h on ice before adding to the binding reaction. Supplementary Table S3 listed the nucleotide sequences of the labeled probes and unlabeled competitors.

### **Western blot assay**

Amnion was homogenized in RIPA lysis buffer (Beyotime, Jiangsu, China) to get total proteins. Extracted protein samples were separated by SDS-PAGE and transferred to a PVDF membrane (Millipore, Billerica, MA, USA). After being blocked with 5% non-fat milk in TBS-T at room temperature for 1 h, the membrane was incubated with primary antibodies against human IKZF1 (R&D System, Minneapolis, MN, USA) or Sp1 (Millipore) or cyclophilin B (Abcam, Cambridge, UK) overnight at 4°C. The bound antibodies were detected with horseradish peroxidase-conjugated horse anti-goat IgG (Ding Guo Biotechnology Co., Shanghai, China) for 2 h at room temperature and visualized using enhanced chemiluminescence solution (Thermo Scientific) with ImageQuant LAS 4000 mini system (GE Healthcare, Piscataway, NJ, USA).

**Supplementary tables**

**Supplementary Table S1: Microarray detection of differentially expressed genes in *EPAS1* stably expressed Flp-In-293 cells**

| Probe ID     | Gene Name | Gene Description                                         | Fold change | CI_low | CI_high | P value                |
|--------------|-----------|----------------------------------------------------------|-------------|--------|---------|------------------------|
| 200879_s_at  | EPAS1     | endothelial PAS domain protein 1                         | 4.481       | 3.793  | 5.294   | $1.20 \times 10^{-69}$ |
| 215446_s_at  | LOX       | lysyl oxidase                                            | 1.583       | 1.467  | 1.708   | $2.78 \times 10^{-32}$ |
| 204298_s_at  | LOX       | lysyl oxidase                                            | 2.318       | 2.013  | 2.669   | $1.35 \times 10^{-31}$ |
| 36711_at     | MAFF      | v-maf musculoaponeurotic fibrosarcoma oncogene homolog F | 2.315       | 1.922  | 2.787   | $8.02 \times 10^{-19}$ |
| 218507_at    | C7orf68   | chromosome 7 open reading frame 68                       | 1.262       | 1.190  | 1.339   | $7.19 \times 10^{-15}$ |
| 229700_at    | ZNF738    | zinc finger protein 738                                  | 0.466       | 0.382  | 0.570   | $7.60 \times 10^{-14}$ |
| 200621_at    | CSRP1     | cysteine and glycine-rich protein 1                      | 0.548       | 0.467  | 0.644   | $2.32 \times 10^{-13}$ |
| 1554452_a_at | C7orf68   | chromosome 7 open reading frame 68                       | 1.217       | 1.152  | 1.284   | $1.25 \times 10^{-12}$ |
| 227209_at    | CNTN1     | contactin 1                                              | 1.461       | 1.310  | 1.629   | $8.85 \times 10^{-12}$ |
| 231798_at    | NOG       | noggin                                                   | 1.764       | 1.487  | 2.092   | $7.16 \times 10^{-11}$ |
| 204595_s_at  | STC1      | stanniocalcin 1                                          | 1.649       | 1.412  | 1.924   | $2.34 \times 10^{-10}$ |

|              |         |                                                       |       |       |       |                        |
|--------------|---------|-------------------------------------------------------|-------|-------|-------|------------------------|
| 200632_s_at  | NDRG1   | N-myc downstream regulated 1                          | 1.173 | 1.115 | 1.234 | $5.03 \times 10^{-10}$ |
| 242517_at    | KISS1R  | KISS1 receptor                                        | 1.446 | 1.282 | 1.630 | $1.85 \times 10^{-09}$ |
| 208763_s_at  | TSC22D3 | TSC22 domain family, member 3                         | 1.103 | 1.068 | 1.139 | $2.33 \times 10^{-09}$ |
| 227671_at    | XIST    | X (inactive)-specific transcript (non-protein coding) | 0.942 | 0.923 | 0.960 | $2.62 \times 10^{-09}$ |
| 212063_at    | CD44    | CD44 molecule (Indian blood group)                    | 0.635 | 0.543 | 0.743 | $1.21 \times 10^{-08}$ |
| 219908_at    | DKK2    | dickkopf homolog 2 ( <i>Xenopus laevis</i> )          | 1.874 | 1.503 | 2.335 | $2.28 \times 10^{-08}$ |
| 241404_at    | NA      | NA                                                    | 1.799 | 1.456 | 2.222 | $5.27 \times 10^{-08}$ |
| 218177_at    | CHMP1B  | chromatin modifying protein 1B                        | 1.575 | 1.333 | 1.861 | $9.84 \times 10^{-08}$ |
| 1554876_a_at | S100Z   | S100 calcium binding protein Z                        | 0.540 | 0.429 | 0.680 | $1.68 \times 10^{-07}$ |
| 200665_s_at  | SPARC   | secreted protein, acidic, cysteine-rich (osteonectin) | 0.582 | 0.474 | 0.715 | $2.58 \times 10^{-07}$ |
| 238066_at    | RBP7    | retinol binding protein 7, cellular                   | 0.720 | 0.635 | 0.816 | $2.58 \times 10^{-07}$ |
| 1553470_at   | DNAH17  | dynein, axonemal, heavy chain 17                      | 1.694 | 1.381 | 2.078 | $4.35 \times 10^{-07}$ |
| 201170_s_at  | BHLHE40 | basic helix-loop-helix family, member e40             | 1.235 | 1.137 | 1.342 | $5.99 \times 10^{-07}$ |
| 201100_s_at  | USP9X   | ubiquitin specific peptidase 9, X-linked              | 0.930 | 0.904 | 0.957 | $6.19 \times 10^{-07}$ |

---

|           |       |                                  |       |       |       |                        |
|-----------|-------|----------------------------------|-------|-------|-------|------------------------|
| 200878_at | EPAS1 | endothelial PAS domain protein 1 | 0.669 | 0.571 | 0.784 | $6.78 \times 10^{-07}$ |
| 211175_at | GPR45 | G protein-coupled receptor 45    | 1.723 | 1.389 | 2.136 | $7.30 \times 10^{-07}$ |

---

Note: NA, not available

**Supplementary Table S2: Sequences of primers used in this study**

| Primer Name      | Target region    | Sequence 5' to 3'                       | Roles       |
|------------------|------------------|-----------------------------------------|-------------|
| pcDNA3.1-IKZF1-F | IKZF1 CDS region | CCGGAATTCGCCACCATGGATGCTGATGAGGGTCAAG   | Cloning PCR |
| pcDNA3.1-IKZF1-R | IKZF1 CDS region | CCCAAGCTTGCTCATGTGGAAGCGGTGCTC          | Cloning PCR |
| pcDNA3.1-Sp1-F   | Sp1 CDS region   | CCGGAATTCGCCACCATGGGAAGCGACCAAGATCACTCC | Cloning PCR |
| pcDNA3.1-Sp1-R   | Sp1 CDS region   | CGGGGTACCGAAGCCATTGCCACTGATATTAATG      | Cloning PCR |
| pEGFP-EPAS1-F    | EPAS1 CDS region | CCCAAGCTTATGACAGCTGACAAGGAGAAG          | Cloning PCR |
| pEGFP-EPAS1-R    | EPAS1 CDS region | CGCGGATCCCTACTAGGTGGCCTGGTCCAGGGCTCTG   | Cloning PCR |
| pcDNA5.1-EPAS1-F | EPAS1 CDS region | CGCGGATCCGCCACCATGGACTACAAGGATGACG      | Cloning PCR |
| pcDNA5.1-EPAS1-R | EPAS1 CDS region | GCGGATATCCTAGGTGGCCTGGTCCAGGGCTCTGAGG   | Cloning PCR |
| EPAS1-pro-F      | EPAS1 promoter   | CGGGGTACCGAGGCTGTTGTGGTGA ACTACT        | Cloning PCR |
| EPAS1-pro-R      | EPAS1 promoter   | CCGCTCGAGTCAGGACACTGCCGAGGAT            | Cloning PCR |
| LOX-pro-F        | LOX promoter     | TCCCCCGGGTTCGCCTGTCTGAGTT               | Cloning PCR |
| LOX-pro-R        | LOX exon 1       | CCCAAGCTTCACTCCTTTTGCCAGA               | Cloning PCR |



---

|                 |                     |                                      |                   |
|-----------------|---------------------|--------------------------------------|-------------------|
| EPAS1-SNP-Mut-F | EPAS1 promoter      | TTTCCAACACCTGTAGCCTTTGCGTTTCCCAGGAC  | Site mutation PCR |
| EPAS1-SNP-Mut-R | EPAS1 promoter      | GCAAAGGCTACAGGTGTTGGAAATTTGTAGATTTAA | Site mutation PCR |
| EPAS1-seq-F1    | EPAS1 promoter      | GGTCCTTCCACAGCCTTCA                  | Sequencing        |
| EPAS1-seq-R1    | EPAS1 promoter      | TAAGGGCTCACACAGGCAAC                 | Sequencing        |
| EPAS1-seq-F2    | EPAS1 promoter      | GCCGAGAAATTATCCCCACCT                | Sequencing        |
| EPAS1-seq-R2    | EPAS1 promoter      | CACAGCGTCGGTGCCTCGTA                 | Sequencing        |
| EPAS1-indel-F   | EPAS1 promoter      | GATGCAGTGA CT TGAGGGCACAT            | Indel-PCR         |
| EPAS1-indel-R   | EPAS1 promoter      | TTTTGCCAGATTGACCCCG                  | Indel-PCR         |
| EPAS1-F         | EPAS1 coding region | ATAAGTTCACCCAAAACCCCAT               | qRT-PCR           |
| EPAS1-R         | EPAS1 coding region | GGCAGCAGGTAGGACTCAAAT                | qRT-PCR           |
| GAPDH-F         | GAPDH coding region | GAGTCAACGGATTTGGTCGT                 | qRT-PCR           |
| GAPDH-R         | GAPDH coding region | CATGGGTGGAATCATATTGGA                | qRT-PCR           |
| LOX-F           | LOX coding region   | AGCATA CAGGGCAGATGTCAGAG             | qRT-PCR           |
| LOX-R           | LOX coding region   | CTTGGTCGGCTGGGTAAGAAAT               | qRT-PCR           |

---

---

|            |              |                     |           |
|------------|--------------|---------------------|-----------|
| ChIP-LOX-F | LOX promoter | TGGCATTGCTTGGTGGAGA | ChIP-qPCR |
| ChIP-LOX-R | LOX promoter | TTTTGCCAGATTGACCCCG | ChIP-qPCR |

---

Note: Underlined bases indicated the restriction sites

**Supplementary Table S3: Sequences of probes used for EMSA**

| Probe name                                                   | Sequence (5'to3')                        | Base number |
|--------------------------------------------------------------|------------------------------------------|-------------|
| 5'-biotin end-labeled G oligonucleotides (sense)             | GTAGCCTTTGGGTTTCCCAGGACTTCCATC           | 30          |
| 5'-biotin end-labeled G oligonucleotides (antisense)         | GATGGAAGTCCTGGGAAACCCAAAGGCTAC           | 30          |
| Unlabeled G oligonucleotides (sense)                         | GTAGCCTTTGGGTTTCCCAGGACTTCCATC           | 30          |
| Unlabeled G oligonucleotides (antisense)                     | GATGGAAGTCCTGGGAAACCCAAAGGCTAC           | 30          |
| 5'-biotin end-labeled C oligonucleotides (sense)             | GTAGCCTTTGCGTTTCCCAGGACTTCCATC           | 30          |
| 5'-biotin end-labeled C oligonucleotides (antisense)         | GATGGAAGTCCTGGGAAACGCAAAGGCTAC           | 30          |
| Unlabeled C oligonucleotides (sense)                         | GTAGCCTTTGCGTTTCCCAGGACTTCCATC           | 30          |
| Unlabeled C oligonucleotides (antisense)                     | GATGGAAGTCCTGGGAAACGCAAAGGCTAC           | 30          |
| 5'-biotin end-labeled insertion oligonucleotides (sense)     | CGCGCAGGAGCGGCGGGGTGCCGAGAGTAGGGACAGAAGC | 40          |
| 5'-biotin end-labeled insertion oligonucleotides (antisense) | GCTTCTGTCCCTACTCTCGGCACCCCGCCGCTCCTGCGCG | 40          |
| Unlabeled insertion oligonucleotides (sense)                 | CGCGCAGGAGCGGCGGGGTGCCGAGAGTAGGGACAGAAGC | 40          |

---

Unlabeled insertion oligonucleotides (antisense)

GCTTCTGTCCCTACTCTCGGCACCCCGCCGCTCCTGCGCG

40

---

### Supplementary figure legends

**Fig. S1:** Schematic representation of *EPASI* gene is given. *EPASI* promoter sequence from -1,988 bp to +100 bp relative to the transcription start site was cloned to pGL3-basic vector to generate luciferase reporter constructs, pGL3-G/deletion/C and pGL3-C/insertion/T. Luciferase reporter construct pGL3-C/deletion/C was generated by PCR-based site-directed mutagenesis at the position of rs56721780:G>C (-886 bp) using pGL3-G/deletion/C as the template. The sites of rs56721780:G>C and -742indel as well as the transcription start site are indicated. Mouse Ik-2 and Ik-3 (also known as IKZF1 isoform 3 and 5 in human, respectively), and Sp1 were computationally predicted as the possible target transcription factors at the sites of rs56721780:G>C and -742indel, respectively, by the website software TFSEARCH (version 1.3, threshold score 85.0, classification: vertebrate).

**Fig. S2:** *EPASI* genotypes at the -742indel site were verified by PCR method. Samples with wild-type allele (deletion) yielded a PCR product of 154 bp, whereas the mutant allele (insertion) generated a PCR product of 194 bp. The first lane contains a 50-bp DNA size marker. **(a)** PCR results of 15 Tibetan subjects were shown. Totally, 43 Tibetan samples were studied. **(b)** PCR results of 15 Chinese Han subjects were shown. Totally, 25 Chinese Han samples were studied.

**Fig. S3:** Linkage disequilibrium (LD) plot of *EPASI* gene promoter region in Tibetans was shown. The LD was measured using  $R^2$ , only variants with MAF larger than 0.25 were shown. The LD plots were generated using Haploview V3.32 software. LD color scheme is GOLD heat map and LD block was defined using confidence intervals rule.

**Fig. S4:** Three variants in the promoter region of *EPAS1* gene were correlated with *LOX* gene expression levels in amnion. Individuals possessing wild-type alleles at the positions of **(a)** rs56721780:G>C, **(b)** -742indel and **(c)** rs13428739 had lower *LOX* expression levels in amnion. Individuals with two copies of **(d)** C/insertion/T haplotype had much higher *LOX* expression levels in amnion, whereas the **(e)** G/deletion/C haplotype decreased *LOX* expression levels. Relative expression levels were log<sub>2</sub> transformed for plotting, with *GAPDH* as the endogenous control. Data were presented as mean ± S.E. Statistical analysis was performed using the *t* test or *t* test with Welch's correction implemented in the software of Graphpad Prism. \*P < 0.05, \*\*P < 0.01. The numbers in parentheses indicated the counts of individuals with the corresponding genotypes. NA, not available or without the haplotype indicated.

**Fig. S5:** Western blot analysis showed the expression of IKZF1 and Sp1 in the amnion from Tibetan newborns.

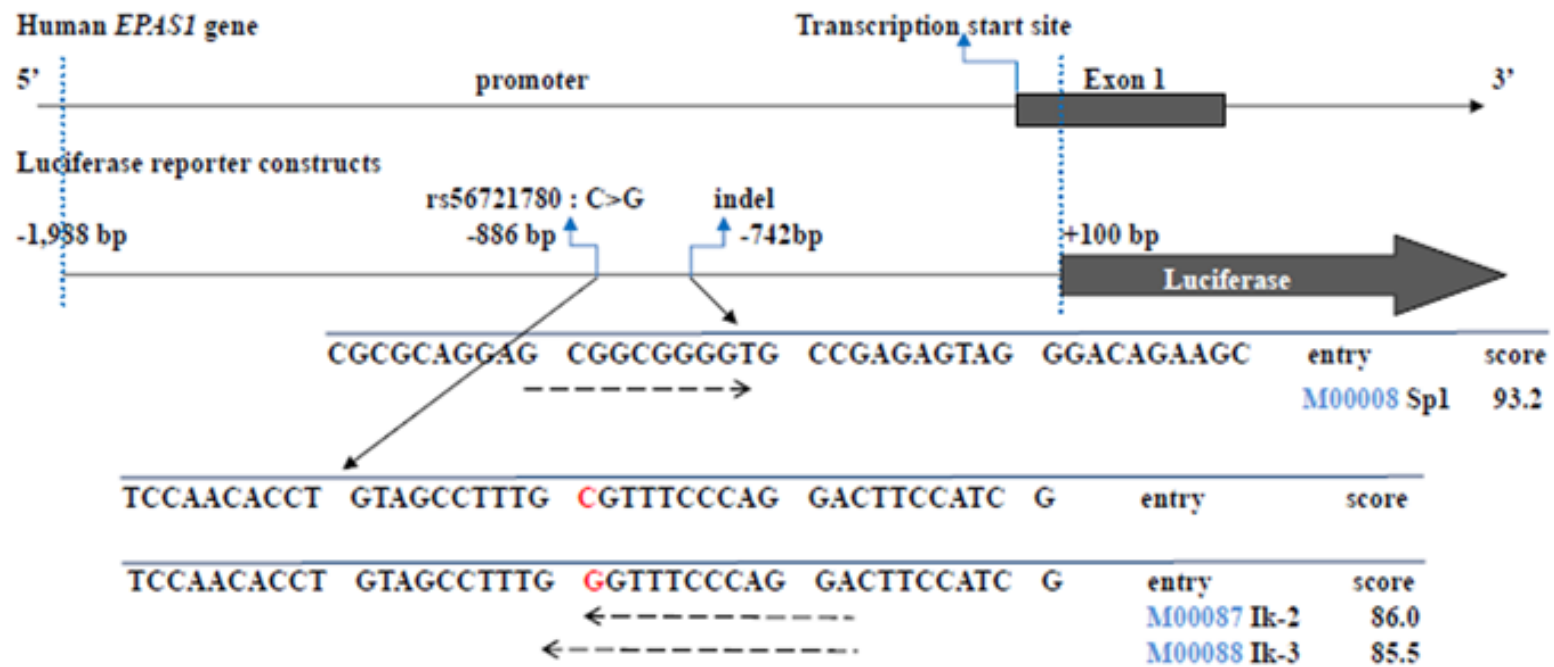

**a**

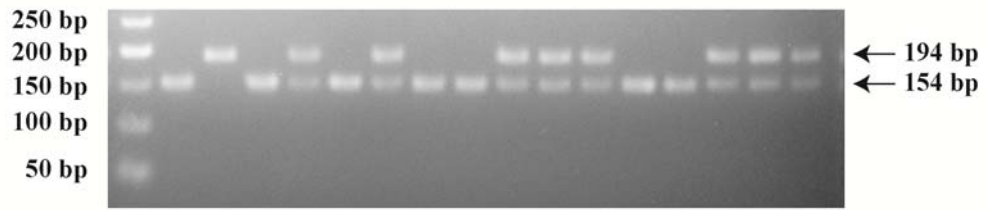

**b**

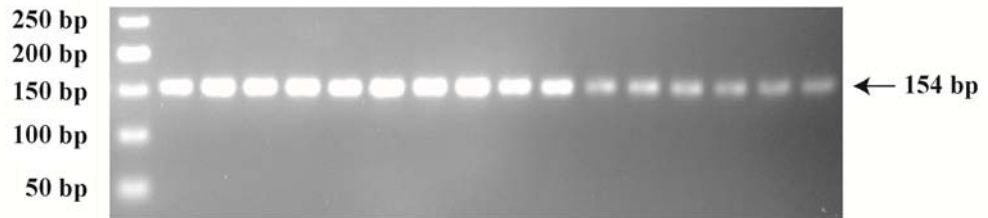



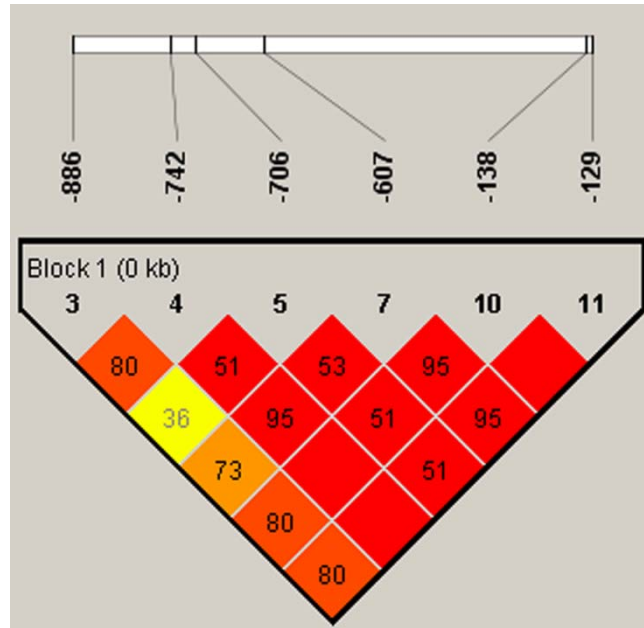

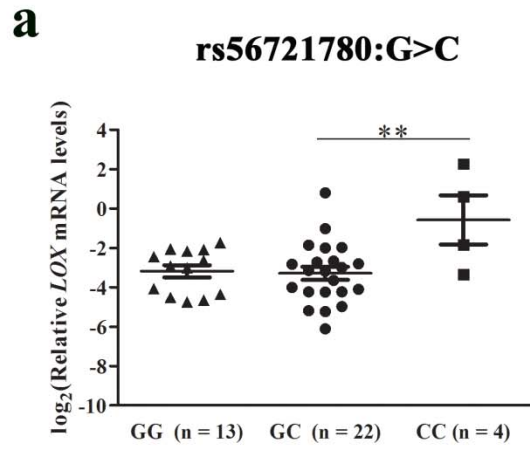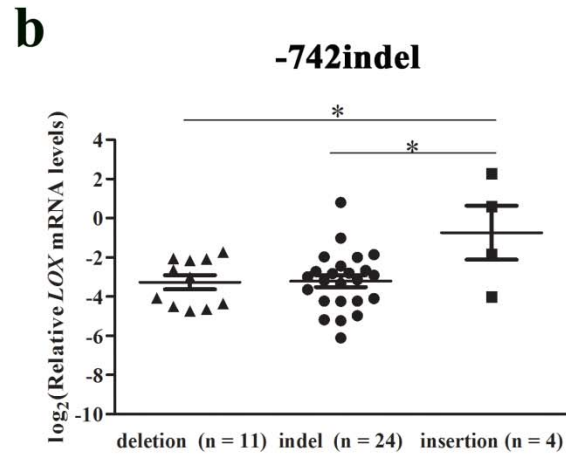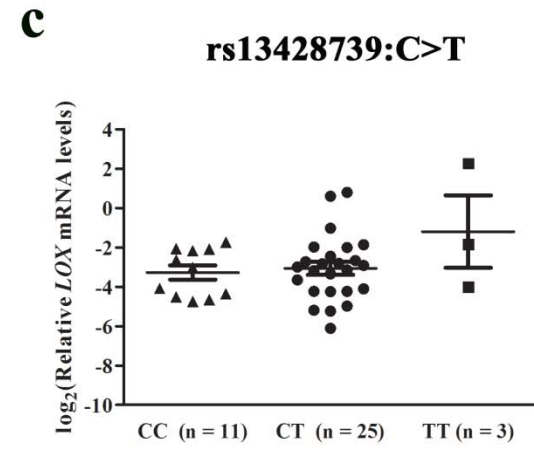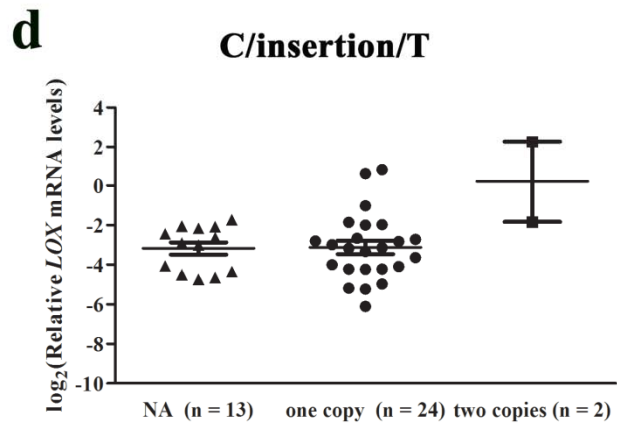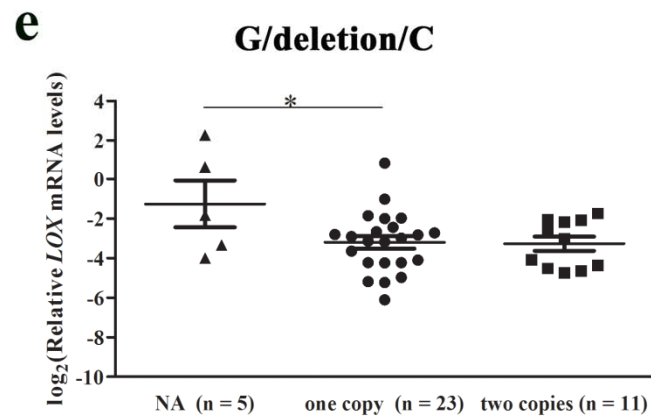

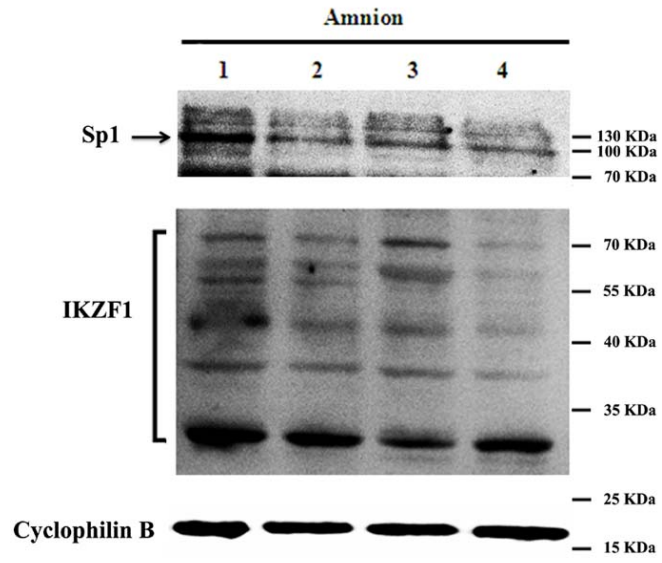

Supplement: srep07465-s1.pdf [file srep07465-s1.pdf]
